# Supplementary material
Source: Elsevier journal article supplement (https://www.sciencedirect.com/science/article/pii/S0025775320307697)
Supplement: mmc1 [file S0025775320307697:mmc1.docx]

Información suplementaria:

Sociedades involucradas y miembros participantes de cada una de ellas que han participado en las guías:

**AEEH**

- Beatriz Mínguez (Barcelona)
- Matías Ávila (Pamplona)
- Ana Matilla (Madrid)
- De la Mata (Córdoba)
- Javier Bustamante (Bilbao)
- Alejandro Forner (Barcelona)
- María Reig (Barcelona)
- María Varela (Oviedo)
- Josep María Llovet (Barcelona)
- Bruno Sangro (Pamplona)
- Jordi Bruix (Barcelona)

**SERAM**

- Miguel A. Pastrana (Madrid)
- Carmen Ayuso (Barcelona)

**SERVEI**

- Marta Burrel (Barcelona)
- José Ignacio Bilbao (Pamplona)
- José Urbano (Madrid)

**SETH**

- Fernando Pardo (Pamplona)
- Itxarone Bilbao (Barcelona)
- Manuel Rodríguez-Perálvarez (Sevilla)

**SEOM**

- Ruth Vera García (Pamplona)
- Josep Tabernero (Barcelona)

**AEC:**

- Miguel Ángel Gómez Bravo (Sevilla)
- Joana Ferrer (Barcelona)

Grupos de trabajo para la elaboración de la actualización de las guías:

  **Grupo 1:** Aspectos epidemiológicos

**Coordinador: Maria Varela**

Ana Matilla, Maria Reig, Manuel de la Mata

     **Grupo 2:** Aspectos moleculares -investigación vs práctica clínica

**Coordinador: Matías Avila**

Beatriz Mínguez, Josep Maria LLovet, Jordi Bruix

    **Grupo 3:** Diagnóstico

**Coordinador: Carmen Ayuso**

Miguel A. Pastrana, Alejandro Forner, Ana Matilla

     **Grupo 4:** Tratamientos quirúrgicos

**Coordinador: Beatriz Mínguez**

- Miguel Ángel Gómez-Bravo, Joana Ferrer, Fernando Pardo, Javier Bustamante, Itxarone Bilbao (Barcelona) ,Manuel Rodriguez-Peralvez (Sevilla)

     **Grupo 5:** Tratamientos percutáneos y loco-regionales

**Coordinador: Alejandro Forner**

Marta Burrel, José Urbano, Maria Varela, Javier Bustamante, Alejandro Forner.

     **Grupo 6:** Tratamiento sistémico

**Coordinador: Bruno Sangro**

Ruth Vera, Jordi Bruix, Josep Tabernero Maria Reig

**Tabla suplementaria 1:**

Tasa de incidencia específica por edad en 2018 según *International Agency for Research on Cancer* (IARC).

| **ASR,** *age-specific rates* |  |
| --- | --- |
| Eastern Asia | **17.7** |
| Micronesia | **15.2** |
| Northern Africa | **14.1** |
| South-Eastern Asia | **13.3** |
| Melanesia | **11.4** |
| Polynesia | **9.2** |
| Western Africa | **8.3** |
| **Southern Europe** | **6.8** |
| North America | **6.6** |
| Middle Africa | **6.5** |
| Central America | **6.3** |
| Australia and New Zealand | **5.7** |
| **Western Europe** | **5.3** |
